# Supplementary material for: PNSA, a Novel C-Terminal Inhibitor of HSP90, Reverses Epithelial–Mesenchymal Transition and Suppresses Metastasis of Breast Cancer Cells In Vitro
Source: PubMed Central journal article supplement (PMC7923764; doi:10.3390/md19020117), 2021-02-20
Supplement: marinedrugs-19-00117-s001.pdf [file marinedrugs-19-00117-s001.pdf]

# PNSA, a novel C-terminal inhibitor of HSP90, reverses epithelial-mesenchymal transition and suppresses metastasis of breast cancer cells in vitro

Aotong Zhang<sup>1</sup>, Xin Qi<sup>1</sup>, Fu Du<sup>1</sup>, Guojian Zhang<sup>1,2</sup>, Dehai Li<sup>1,2</sup> and Jing Li<sup>1,2</sup>

<sup>1</sup> Key Laboratory of Marine Drugs, Chinese Ministry of Education, School of Medicine and Pharmacy, Ocean University of China, Qingdao 266003, China

<sup>2</sup> Open Studio for Druggability Research of Marine Natural Products, Laboratory for Marine Drugs and Bioproducts, Qingdao National Laboratory for Marine Science and Technology, Qingdao 266237, China

\* Correspondence: authors: Key Laboratory of Marine Drugs, Chinese Ministry of Education, School of Medicine and Pharmacy, Ocean University of China, Qingdao 266003, China.  
lijing\_ouc@ouc.edu.cn (Jing.Li); Tel: +81-0532-82031980; Fax: +81-0532-82031980;

## Supplemental Information Table of Contents

### The structure elucidation of PNSA

**Figure S1:** HPLC-UV analysis of PNSA.

**Table S1:** Peak purity report of PNSA.

**Table S2:** HPLC gradient profile for detection of PNSA.

**Figure S2:** The <sup>1</sup>H NMR (500 MHz) spectrum of PNSA in CD<sub>3</sub>OD.

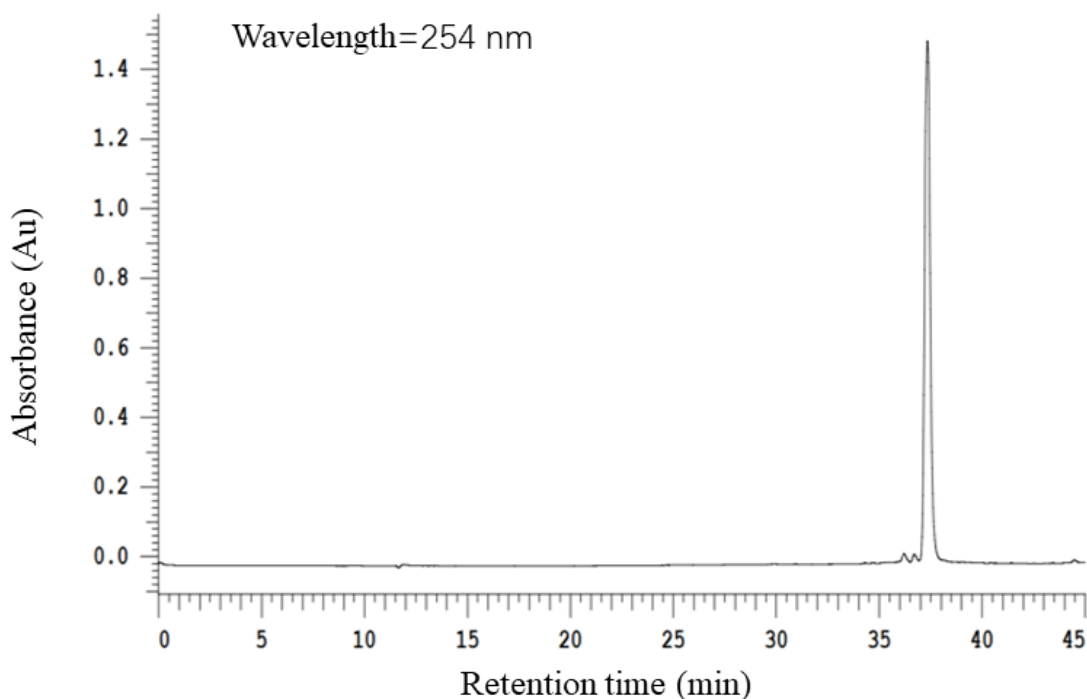

**Supplementary Figure S1.** HPLC-UV analysis of PNSA. The PNSA was analyzed by HPLC made by the HITACHI company equipped with a 5430 diode array detector and a

C18 column (YMC-Pack ODS-A, 4.6 × 250 mm, 5 μm, 1 mL/min) by using stepwise gradient elution with 5–100% MeOH–H<sub>2</sub>O (0-5 min: 5%; 5-35 min: 5%-100%; 35-40 min: 100%; 40.1-45 min 5%).

**Supplementary Table S1.** Peak purity report of PNSA.

| No. | RT     | Area     | Concentration |
|-----|--------|----------|---------------|
| 1   | 36.200 | 148084   | 1.127         |
| 2   | 37.333 | 12988293 | 98.873        |
|     |        | 13136377 | 100.00        |

**Supplementary Table S2.** HPLC gradient profile for detection of PNSA (A: Methanol B: Water).

| Time (min) | Solvent A (%) | Solvent B (%) | Flow (mL/min) |
|------------|---------------|---------------|---------------|
| 0.0        | 5.0           | 95.0          | 1.000         |
| 5.0        | 5.0           | 95.0          | 1.000         |
| 35.0       | 100.0         | 0.0           | 1.000         |
| 40.0       | 100.0         | 0.0           | 1.000         |
| 40.1       | 5.0           | 95.0          | 1.000         |
| 45.0       | 5.0           | 95.0          | 1.000         |

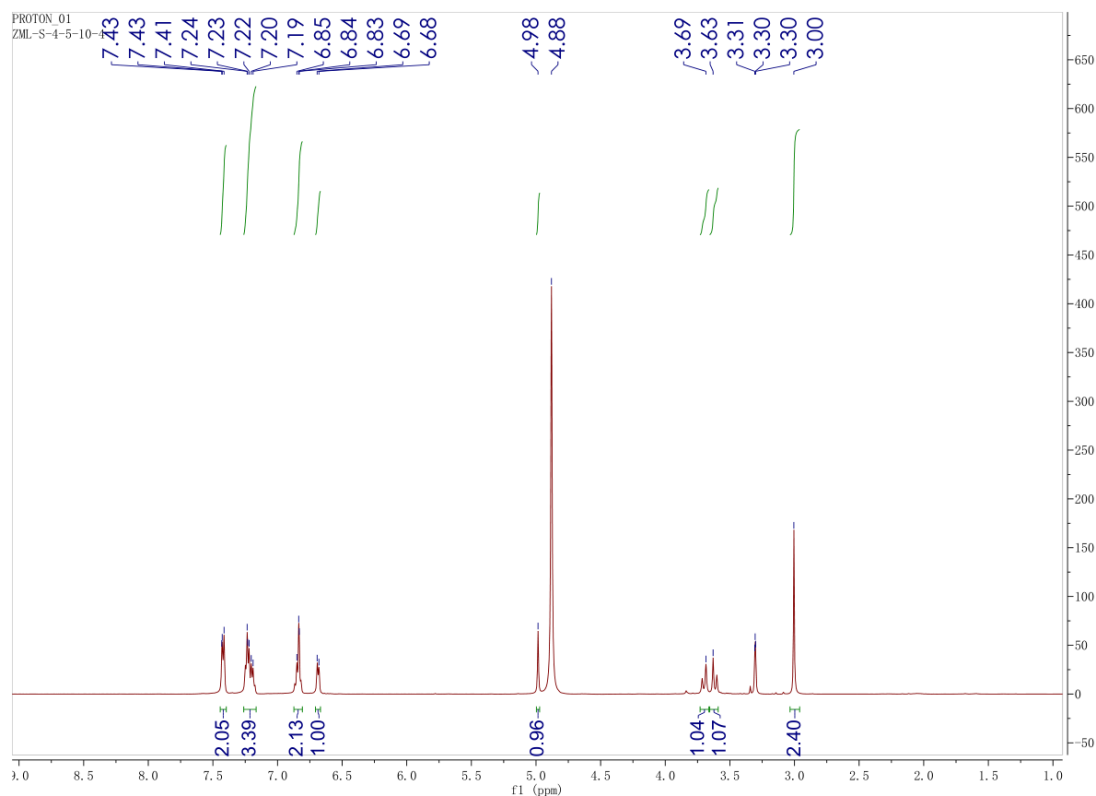

**Supplementary Figure S2.** The <sup>1</sup>H NMR (500 MHz) spectrum of PNSA in CD<sub>3</sub>OD.
